# Supplementary material for: An ytterbium complex with unique luminescence properties: detecting the temperature based on a luminescence spectrum without the interference of oxygen
Source: Royal Society of Chemistry journal article supplement (doi:10.1039/c5dt00611b), 2015-01-01
Supplement: c5dt00611b1.pdf [file c5dt00611b1.pdf]

## An Ytterbium Complex with Unique Luminescence Properties: Detecting Temperature Based on a Luminescence Spectrum without Interference of Oxygen

Minxian Tang,<sup>‡a</sup> Yanjie Huang,<sup>‡a</sup> Yuan Wang<sup>\*a</sup> and Limin Fu<sup>\*b</sup>

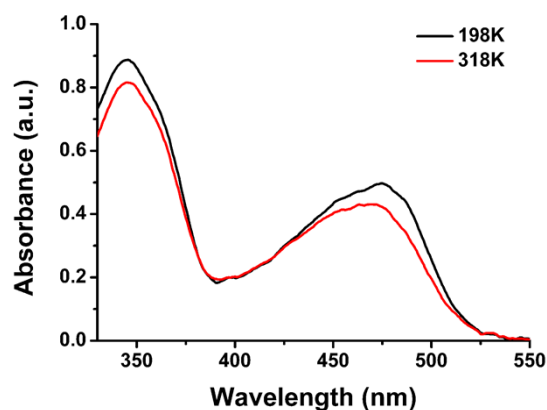

**Figure S1.** UV-Vis absorption spectra of [Yb(tta)<sub>3</sub>DFQZ] in nitrogen saturated toluene with a concentration of  $5 \times 10^{-6}$  mol L<sup>-1</sup> at 198 and 318 K.
